# Supplementary material for: Beneficial Effects of Lactobacillus plantarum Strains on Non-Alcoholic Fatty Liver Disease in High Fat/High Fructose Diet-Fed Rats
Source: Nutrients. 2020 Feb 20;12(2):542. doi: 10.3390/nu12020542 (PMC7071439; doi:10.3390/nu12020542)
Supplement: Supplementary file 1 [file nutrients-12-00542-s001.xlsx]

## Sheet: Table S1
Table S1. ANI values for probiotic strain of Lactobacillus plantarum strains.
Strain	Genoms size (bp)		Accession number	ANI (%)	Note
				with Type strain
ATCC 14917	3198761		ACGZ00000000	100	Type strain, isolated from human saliva
	(9 scaffolds)
ATG-K2	Chromosome	3034884	GCA_003597635.1	96.6	This study
	Plasmid pK2-1	61159
	Plasmid pK2-2	40101
	Plasmid pK2-3	38954
ATG-K6	Chromosome	3205672	GCA_003597595.1	99.16	This study
	Plasmid pK6	56833
WCFS1	Chromosome	3308273	GCA_000203855.3	99.19	Increase leptin and T cell level to ameliorate high fat diet-induced pathology in mice
	Plasmid pWCFS101	1917
	Plasmid pWCFS102	2365
	Plasmid pWCFS103	36069
JDM1	Chromosome	3197759	GCA_000023085.1	99.11	Chinese commercial LAB with several probiotic functions
LZ227	Chromosome	3131750	GCA_001660025.1	99.03	Produce both riboflavin and folate
	Plasmid LZ227p1	74177
	Plasmid LZ227p2	52148
	Plasmid LZ227p3	35461
	Plasmid LZ227p4	93544
	Plasmid LZ227p5	38212
ST-III	Chromosome	3254376	GCA_000148815.2	99.21	Inhibit the growth of Streptococcus mutans from children with active caries
	Plasmid pST-III	53560

## Sheet: Table S2_Phylum
Read number	Taxonomy	Phylum (Aggregated)	NC1	NC2	NC3	HC1	HC2	HC3	PC1	PC2	PC3	K2-1	K2-2	K2-3	K6-1	K6-2	K6-3	Combined
	D_0__Bacteria, D_1__Firmicutes	Firmicutes	33098	34783	27046	41234	26725	42533	25697	23418	18851	31558	41365	36205	18058	38677	38540	477788
	D_0__Bacteria, D_1__Bacteroidetes	Bacteroidetes	13609	10093	12467	3103	1563	2285	9405	9375	1324	7471	5220	4872	5279	13499	3011	102576
	D_0__Bacteria, D_1__Verrucomicrobia	Verrucomicrobia	1425	3701	1350	184	194	468	3727	2691	313	1420	3824	374	825	11761	1230	33487
	D_0__Bacteria, D_1__Proteobacteria	Proteobacteria	695	559	1259	1981	313	101	2521	1425	2663	5576	57	2794	43	598	519	21104
	D_0__Bacteria, D_1__Actinobacteria	Actinobacteria	155	25	39	32	826	15	154	339	4027	206	29	20	17	101	37	6022
	D_0__Bacteria, D_1__Tenericutes	Tenericutes	220	204	0	336	12	129	6	147	8	186	17	33	46	172	146	1662
	D_0__Bacteria, D_1__Deferribacteres	Deferribacteres	0	0	0	8	1	4	3	11	7	30	16	14	6	168	63	331
	D_0__Bacteria, D_1__Cyanobacteria	Cyanobacteria	1	1	0	0	0	0	2	48	0	4	2	2	0	1	4	65
	D_0__Bacteria, D_1__Elusimicrobia	Elusimicrobia	24	8	4	0	0	0	13	0	0	0	0	0	0	0	0	49
	N/A	N/A	0	2	2	0	2	0	2	4	0	0	0	4	4	0	0	20
	D_0__Bacteria, D_1__Saccharibacteria	Saccharibacteria	0	0	0	0	0	0	0	0	0	0	0	0	0	0	4	4
	D_0__Bacteria,	{Unknown Phylum} Bacteria	0	0	2	0	0	0	0	0	0	0	0	0	0	0	0	2
		total	49227	49376	42169	46878	29636	45535	41530	37458	27193	46451	50530	44318	24278	64977	43554	643110
(%)	Taxonomy	Phylum (Aggregated)	NC1	NC2	NC3	HC1	HC2	HC3	PC1	PC2	PC3	K2-1	K2-2	K2-3	K6-1	K6-2	K6-3
	D_0__Bacteria, D_1__Firmicutes	Firmicutes	67.2355	70.4452	64.1372	87.9602	90.1775	93.4073	61.8758	62.518	69.323	67.9383	81.8623	81.6937	74.3801	59.5241	88.4879
	D_0__Bacteria, D_1__Bacteroidetes	Bacteroidetes	27.6454	20.4411	29.5644	6.61931	5.27399	5.01812	22.6463	25.028	4.8689	16.0836	10.3305	10.9933	21.744	20.775	6.91326
	D_0__Bacteria, D_1__Verrucomicrobia	Verrucomicrobia	2.89475	7.49554	3.2014	0.392508	0.654609	1.02778	8.97424	7.18405	1.15103	3.05698	7.56778	0.843901	3.39814	18.1003	2.82408
	D_0__Bacteria, D_1__Proteobacteria	Proteobacteria	1.41183	1.13213	2.98561	4.22586	1.05615	0.221807	6.07031	3.80426	9.79296	12.004	0.112804	6.30444	0.177115	0.920326	1.19162
	D_0__Bacteria, D_1__Actinobacteria	Actinobacteria	0.314868	0.0506319	0.092485	0.0682623	2.78715	0.0329417	0.370816	0.905014	14.809	0.443478	0.0573916	0.0451284	0.0700222	0.15544	0.084952
	D_0__Bacteria, D_1__Tenericutes	Tenericutes	0.446909	0.413156	0	0.716754	0.0404913	0.283299	0.0144474	0.39244	0.0294193	0.400422	0.0336434	0.0744618	0.189472	0.264709	0.335216
	D_0__Bacteria, D_1__Deferribacteres	Deferribacteres	0	0	0	0.0170656	0.00337427	0.00878445	0.00722369	0.0293662	0.0257419	0.0645842	0.0316644	0.0315899	0.0247137	0.258553	0.144648
	D_0__Bacteria, D_1__Cyanobacteria	Cyanobacteria	0.00203141	0.00202528	0	0	0	0	0.0048158	0.128144	0	0.00861122	0.00395804	0.00451284	0	0.00153901	0.009184
	D_0__Bacteria, D_1__Elusimicrobia	Elusimicrobia	0.0487537	0.0162022	0.00948564	0	0	0	0.0313027	0	0	0	0	0	0	0	0
	N/A	N/A	0	0.00405055	0.00474282	0	0.00674855	0	0.0048158	0.0106786	0	0	0	0.00902568	0.0164758	0	0
	D_0__Bacteria, D_1__Saccharibacteria	Saccharibacteria	0	0	0	0	0	0	0	0	0	0	0	0	0	0	0.009184
	D_0__Bacteria,	{Unknown Phylum} Bacteria	0	0	0.00474282	0	0	0	0	0	0	0	0	0	0	0	0
Average	Taxonomy	Phylum (Aggregated)	NC	HC	PC	K2	K6
	D_0__Bacteria, D_1__Firmicutes	Firmicutes	67.2726	90.515	64.5723	77.1647	74.1307
	D_0__Bacteria, D_1__Bacteroidetes	Bacteroidetes	25.8836	5.63714	17.5144	12.4691	16.4774
	D_0__Bacteria, D_1__Verrucomicrobia	Verrucomicrobia	4.53057	0.691633	5.76977	3.82289	8.10749
	D_0__Bacteria, D_1__Proteobacteria	Proteobacteria	1.84319	1.83461	6.55584	6.14043	0.763022
	D_0__Bacteria, D_1__Actinobacteria	Actinobacteria	0.152662	0.962785	5.3616	0.181999	0.103471
	D_0__Bacteria, D_1__Tenericutes	Tenericutes	0.286688	0.346848	0.145435	0.169509	0.263132
	D_0__Bacteria, D_1__Deferribacteres	Deferribacteres	0	0.00974143	0.0207773	0.0426128	0.142638
	D_0__Bacteria, D_1__Cyanobacteria	Cyanobacteria	0.00135223	0	0.0443198	0.00569404	0.00357434
	D_0__Bacteria, D_1__Elusimicrobia	Elusimicrobia	0.0248139	0	0.0104342	0	0
	N/A	N/A	0.00293112	0.00224952	0.00516481	0.00300856	0.00549194
	D_0__Bacteria, D_1__Saccharibacteria	Saccharibacteria	0	0	0	0	0.00306133
	D_0__Bacteria,	Unknown Phylum	0.00158094	0	0	0	0

## Sheet: Table S3_Family
Read number	Taxonomy	Family	NC1	NC2	NC3	HC1	HC2	HC3	PC1	PC2	PC3	K2-1	K2-2	K2-3	K6-1	K6-2	K6-3	Combined
	D_0__Bacteria, D_1__Firmicutes, D_2__Clostridia, D_3__Clostridiales, D_4__Ruminococcaceae	Ruminococcaceae	22453	14892	17449	18294	12212	20307	14179	15320	6019	10552	13236	12196	12169	24423	9945	223646
	D_0__Bacteria, D_1__Firmicutes, D_2__Clostridia, D_3__Clostridiales, D_4__Lachnospiraceae	Lachnospiraceae	5908	16982	8146	20916	5453	19523	6711	7314	5300	15206	26890	11577	4908	9163	17569	181566
	D_0__Bacteria, D_1__Bacteroidetes, D_2__Bacteroidia, D_3__Bacteroidales, D_4__Bacteroidaceae	Bacteroidaceae	8574	5697	9778	1411	652	1188	3926	7095	592	5515	2696	4050	3265	6451	1049	61939
	D_0__Bacteria, D_1__Firmicutes, D_2__Bacilli, D_3__Lactobacillales, D_4__Lactobacillaceae	Lactobacillaceae	1551	1872	78	454	5427	1972	2802	84	1490	2707	362	9272	117	2541	7884	38613
	D_0__Bacteria, D_1__Bacteroidetes, D_2__Bacteroidia, D_3__Bacteroidales, D_4__Bacteroidales S24-7 group	Bacteroidales S24-7 group	4746	4299	2523	1659	867	1058	5388	1830	666	1782	2479	724	1929	6824	1802	38576
	D_0__Bacteria, D_1__Verrucomicrobia, D_2__Verrucomicrobiae, D_3__Verrucomicrobiales, D_4__Verrucomicrobiaceae	Verrucomicrobiaceae	1425	3701	1350	184	194	468	3727	2691	313	1420	3824	374	825	11761	1230	33487
	D_0__Bacteria, D_1__Proteobacteria, D_2__Gammaproteobacteria, D_3__Enterobacteriales, D_4__Enterobacteriaceae	Enterobacteriaceae	214	205	70	144	13	81	104	1024	2266	5470	44	90	12	97	71	9905
	D_0__Bacteria, D_1__Firmicutes, D_2__Erysipelotrichia, D_3__Erysipelotrichales, D_4__Erysipelotrichaceae	Erysipelotrichaceae	542	58	583	246	669	78	81	216	4040	337	33	414	110	173	83	7663
	D_0__Bacteria, D_1__Firmicutes, D_2__Clostridia, D_3__Clostridiales, D_4__Peptostreptococcaceae	Peptostreptococcaceae	761	249	71	191	1078	85	377	41	180	793	283	1316	149	320	1118	7012
	D_0__Bacteria, D_1__Firmicutes, D_2__Clostridia, D_3__Clostridiales, D_4__Christensenellaceae	Christensenellaceae	1497	522	409	814	318	343	216	79	196	147	285	153	286	1359	134	6758
	D_0__Bacteria, D_1__Proteobacteria, D_2__Deltaproteobacteria, D_3__Desulfovibrionales, D_4__Desulfovibrionaceae	Desulfovibrionaceae	48	61	615	1814	0	0	780	266	0	0	0	2698	0	0	0	6282
	D_0__Bacteria, D_1__Firmicutes, D_2__Clostridia, D_3__Clostridiales, D_4__Clostridiaceae 1	Clostridiaceae 1	9	0	124	51	737	71	834	17	2	1189	61	895	101	182	1507	5780
	D_0__Bacteria, D_1__Actinobacteria, D_2__Actinobacteria, D_3__Corynebacteriales, D_4__Corynebacteriaceae	Corynebacteriaceae	132	11	34	21	776	9	129	263	2275	175	18	8	3	78	27	3959
	D_0__Bacteria, D_1__Proteobacteria, D_2__Betaproteobacteria, D_3__Burkholderiales, D_4__Alcaligenaceae	Alcaligenaceae	421	283	552	20	95	7	1547	22	272	53	11	3	27	66	4	3383
	D_0__Bacteria, D_1__Firmicutes, D_2__Clostridia, D_3__Clostridiales, D_4__Peptococcaceae	Peptococcaceae	18	41	73	161	142	75	308	196	202	266	118	199	90	119	143	2151
	D_0__Bacteria, D_1__Firmicutes, D_2__Bacilli, D_3__Lactobacillales, D_4__Aerococcaceae	Aerococcaceae	149	10	25	14	247	12	105	87	1109	76	18	17	36	66	25	1996
	D_0__Bacteria, D_1__Actinobacteria, D_2__Actinobacteria, D_3__Micrococcales, D_4__Micrococcaceae	Micrococcaceae	21	13	4	11	42	6	6	73	1703	28	10	8	9	21	7	1962
	D_0__Bacteria, D_1__Proteobacteria, D_2__Gammaproteobacteria, D_3__Pseudomonadales, D_4__Moraxellaceae	Moraxellaceae	12	9	0	2	205	12	84	92	124	43	1	0	1	429	442	1456
	D_0__Bacteria, D_1__Firmicutes, D_2__Bacilli, D_3__Lactobacillales, D_4__Streptococcaceae	Streptococcaceae	160	141	37	50	105	45	18	22	30	90	52	100	60	140	41	1091
	D_0__Bacteria, D_1__Bacteroidetes, D_2__Bacteroidia, D_3__Bacteroidales, D_4__Porphyromonadaceae	Porphyromonadaceae	34	12	112	3	22	4	52	206	58	96	35	75	45	133	2	889
	D_0__Bacteria, D_1__Bacteroidetes, D_2__Bacteroidia, D_3__Bacteroidales, D_4__Rikenellaceae	Rikenellaceae	197	54	36	23	22	35	39	165	4	68	5	20	24	82	14	788
	D_0__Bacteria, D_1__Tenericutes, D_2__Mollicutes, D_3__Anaeroplasmatales, D_4__Anaeroplasmataceae	Anaeroplasmataceae	0	63	0	189	0	25	4	145	4	119	6	20	11	0	38	624
	D_0__Bacteria, D_1__Tenericutes, D_2__Mollicutes, D_3__Mollicutes RF9, Ambiguous_taxa	Ambiguous_taxa	168	131	0	65	6	91	0	1	0	47	9	2	8	36	53	617
	D_0__Bacteria, D_1__Firmicutes, D_2__Bacilli, D_3__Bacillales, D_4__Staphylococcaceae	Staphylococcaceae	19	2	14	15	252	5	14	25	102	37	6	20	7	62	9	589
	D_0__Bacteria, D_1__Tenericutes, D_2__Mollicutes, D_3__Mollicutes RF9, D_4__uncultured bacterium	uncultured bacterium-2	50	8	0	81	6	13	0	0	4	11	2	11	26	129	48	389
	D_0__Bacteria, D_1__Firmicutes, D_2__Clostridia, D_3__Clostridiales, D_4__Family XIII	Family XIII	15	7	29	7	30	8	45	7	38	38	2	24	9	75	36	370
	D_0__Bacteria, D_1__Deferribacteres, D_2__Deferribacteres, D_3__Deferribacterales, D_4__Deferribacteraceae	Deferribacteraceae	0	0	0	8	1	4	3	11	7	30	16	14	6	168	63	331
	D_0__Bacteria, D_1__Bacteroidetes, D_2__Bacteroidia, D_3__Bacteroidales, D_4__Prevotellaceae	Prevotellaceae	58	31	18	7	0	0	0	79	4	10	5	3	16	2	27	260
	D_0__Bacteria, D_1__Firmicutes, D_2__Bacilli, D_3__Lactobacillales, D_4__Enterococcaceae	Enterococcaceae	9	3	1	0	26	1	4	4	99	87	5	4	4	5	4	256
	D_0__Bacteria, D_1__Firmicutes, D_2__Clostridia, D_3__Clostridiales, D_4__Clostridiales vadinBB60 group	Clostridiales vadinBB60 group	0	2	0	12	5	4	0	2	2	19	0	9	8	25	37	125
	D_0__Bacteria, D_1__Firmicutes, D_2__Clostridia, D_3__Clostridiales, D_4__Defluviitaleaceae	Defluviitaleaceae	7	2	7	7	14	3	1	1	3	7	14	9	2	9	1	87
	D_0__Bacteria, D_1__Bacteroidetes, D_2__Sphingobacteriia, D_3__Sphingobacteriales, D_4__Sphingobacteriaceae	Sphingobacteriaceae	0	0	0	0	0	0	0	0	0	0	0	0	0	6	70	76
	D_0__Bacteria, D_1__Actinobacteria, D_2__Coriobacteriia, D_3__Coriobacteriales, D_4__Coriobacteriaceae	Coriobacteriaceae	2	1	1	0	4	0	9	3	36	3	1	4	5	1	1	71
	D_0__Bacteria, D_1__Cyanobacteria, D_2__Melainabacteria, D_3__Gastranaerophilales, D_4__uncultured bacterium	uncultured bacterium-1	1	1	0	0	0	0	0	48	0	4	2	2	0	1	4	63
	D_0__Bacteria, D_1__Proteobacteria, D_2__Alphaproteobacteria, D_3__Rhodospirillales, D_4__Rhodospirillaceae	Rhodospirillaceae	0	0	19	0	0	0	3	20	0	8	0	1	3	1	0	55
	D_0__Bacteria, D_1__Elusimicrobia, D_2__Elusimicrobia, D_3__Elusimicrobiales, D_4__Elusimicrobiaceae	Elusimicrobiaceae	24	8	4	0	0	0	13	0	0	0	0	0	0	0	0	49
	D_0__Bacteria, D_1__Bacteroidetes, D_2__Flavobacteriia, D_3__Flavobacteriales, D_4__Flavobacteriaceae	Flavobacteriaceae	0	0	0	0	0	0	0	0	0	0	0	0	0	1	47	48
	D_0__Bacteria, D_1__Firmicutes, D_2__Bacilli, D_3__Bacillales, D_4__Planococcaceae	Planococcaceae	0	0	0	0	8	1	2	3	8	2	0	0	0	10	1	35
	D_0__Bacteria, D_1__Firmicutes, D_2__Bacilli, D_3__Lactobacillales, D_4__Carnobacteriaceae	Carnobacteriaceae	0	0	0	0	0	0	0	0	25	0	0	0	0	5	0	30
	D_0__Bacteria, D_1__Tenericutes, D_2__Mollicutes, D_3__Mollicutes RF9, D_4__uncultured rumen bacterium	uncultured rumen bacterium	2	2	0	1	0	0	2	1	0	9	0	0	1	5	7	30
	D_0__Bacteria, D_1__Proteobacteria, D_2__Gammaproteobacteria, D_3__Pasteurellales, D_4__Pasteurellaceae	Pasteurellaceae	0	1	3	1	0	1	3	1	1	2	1	2	0	3	0	19
	N/A	N/A	0	2	0	0	2	0	2	4	0	0	0	4	4	0	0	18
	D_0__Bacteria, D_1__Actinobacteria, D_2__Actinobacteria, D_3__Bifidobacteriales, D_4__Bifidobacteriaceae	Bifidobacteriaceae	0	0	0	0	4	0	10	0	0	0	0	0	0	0	0	14
	D_0__Bacteria, D_1__Actinobacteria, D_2__Actinobacteria, D_3__Micrococcales, D_4__Dermabacteraceae	Dermabacteraceae	0	0	0	0	0	0	0	0	7	0	0	0	0	1	0	8
	D_0__Bacteria, D_1__Firmicutes, D_2__Clostridia, D_3__Clostridiales,	{Unknown Family} Clostridiales	0	0	0	2	0	0	0	0	0	3	0	0	2	0	1	8
	D_0__Bacteria, D_1__Actinobacteria, D_2__Actinobacteria, D_3__Micrococcales, D_4__Dermatophilaceae	Dermatophilaceae	0	0	0	0	0	0	0	0	4	0	0	0	0	0	0	4
	D_0__Bacteria, D_1__Firmicutes, , ,	{Unknown Class} Firmicutes	0	0	0	0	0	0	0	0	4	0	0	0	0	0	0	4
	D_0__Bacteria, D_1__Saccharibacteria, D_2__Unknown Class, D_3__Unknown Order, D_4__Unknown Family	Unknown Family	0	0	0	0	0	0	0	0	0	0	0	0	0	0	4	4
	D_0__Bacteria, , , ,	{Unknown Phylum} Bacteria	0	0	2	0	0	0	0	0	0	0	0	0	0	0	0	2
	D_0__Bacteria, D_1__Actinobacteria, D_2__Actinobacteria, D_3__Micrococcales, D_4__Brevibacteriaceae	Brevibacteriaceae	0	0	0	0	0	0	0	0	2	0	0	0	0	0	0	2
	D_0__Bacteria, D_1__Actinobacteria, D_2__Actinobacteria, D_3__Micrococcales, D_4__Microbacteriaceae	Microbacteriaceae	0	0	0	0	0	0	0	0	0	0	0	0	0	0	2	2
	D_0__Bacteria, D_1__Cyanobacteria, D_2__Chloroplast, D_3__Camellia sinensis var. sinensis, D_4__Camellia sinensis var. sinensis	Camellia sinensis var. sinensis	0	0	0	0	0	0	2	0	0	0	0	0	0	0	0	2
	D_0__Bacteria, D_1__Firmicutes, D_2__Bacilli, D_3__Bacillales, D_4__Bacillaceae	Bacillaceae	0	0	0	0	2	0	0	0	0	0	0	0	0	0	0	2
	D_0__Bacteria, D_1__Firmicutes, D_2__Bacilli, D_3__Bacillales, D_4__Paenibacillaceae	Paenibacillaceae	0	0	0	0	0	0	0	0	0	0	0	0	0	0	2	2
	D_0__Bacteria, D_1__Firmicutes, D_2__Clostridia, D_3__Clostridiales, D_4__Caldicoprobacteraceae	Caldicoprobacteraceae	0	0	0	0	0	0	0	0	0	2	0	0	0	0	0	2
	D_0__Bacteria, D_1__Firmicutes, D_2__Negativicutes, D_3__Selenomonadales, D_4__Veillonellaceae	Veillonellaceae	0	0	0	0	0	0	0	0	2	0	0	0	0	0	0	2
	D_0__Bacteria, D_1__Proteobacteria, D_2__Alphaproteobacteria, D_3__Caulobacterales, D_4__Caulobacteraceae	Caulobacteraceae	0	0	0	0	0	0	0	0	0	0	0	0	0	0	2	2
	D_0__Bacteria, D_1__Proteobacteria, D_2__Gammaproteobacteria, D_3__Xanthomonadales, D_4__Xanthomonadaceae	Xanthomonadaceae	0	0	0	0	0	0	0	0	0	0	0	0	0	2	0	2
	D_0__Bacteria, D_1__Tenericutes, D_2__Mollicutes, D_3__Mollicutes RF9,	{Unknown Family} Mollicutes RF9	0	0	0	0	0	0	0	0	0	0	0	0	0	2	0	2
		total	49227	49376	42167	46878	29636	45535	41530	37458	27193	46451	50530	44318	24278	64977	43554
(%)	Taxonomy	Family	NC1	NC2	NC3	HC1	HC2	HC3	PC1	PC2	PC3	K2-1	K2-2	K2-3	K6-1	K6-2	K6-3
	D_0__Bacteria, D_1__Firmicutes, D_2__Clostridia, D_3__Clostridiales, D_4__Ruminococcaceae	Ruminococcaceae	45.6111	30.1604	41.3807	39.0247	41.2066	44.5965	34.1416	40.8991	22.1344	22.7164	26.1943	27.5193	50.1236	37.5871	22.8337
	D_0__Bacteria, D_1__Firmicutes, D_2__Clostridia, D_3__Clostridiales, D_4__Lachnospiraceae	Lachnospiraceae	12.0015	34.3932	19.3184	44.6179	18.3999	42.8747	16.1594	19.5259	19.4903	32.7356	53.2159	26.1226	20.2158	14.1019	40.3384
	D_0__Bacteria, D_1__Bacteroidetes, D_2__Bacteroidia, D_3__Bacteroidales, D_4__Bacteroidaceae	Bacteroidaceae	17.4173	11.538	23.1887	3.00994	2.20003	2.60898	9.45341	18.9412	2.17703	11.8727	5.33544	9.1385	13.4484	9.92813	2.4085
	D_0__Bacteria, D_1__Firmicutes, D_2__Bacilli, D_3__Lactobacillales, D_4__Lactobacillaceae	Lactobacillaceae	3.15071	3.79132	0.184979	0.968471	18.3122	4.33073	6.74693	0.224251	5.47935	5.82765	0.716406	20.9215	0.481918	3.91061	18.1017
	D_0__Bacteria, D_1__Bacteroidetes, D_2__Bacteroidia, D_3__Bacteroidales, D_4__Bacteroidales S24-7 group	Bacteroidales S24-7 group	9.64105	8.70666	5.98335	3.53897	2.9255	2.32349	12.9738	4.88547	2.44916	3.8363	4.906	1.63365	7.94547	10.5022	4.13739
	D_0__Bacteria, D_1__Verrucomicrobia, D_2__Verrucomicrobiae, D_3__Verrucomicrobiales, D_4__Verrucomicrobiaceae	Verrucomicrobiaceae	2.89475	7.49554	3.20156	0.392508	0.654609	1.02778	8.97424	7.18405	1.15103	3.05698	7.56778	0.843901	3.39814	18.1003	2.82408
	D_0__Bacteria, D_1__Proteobacteria, D_2__Gammaproteobacteria, D_3__Enterobacteriales, D_4__Enterobacteriaceae	Enterobacteriaceae	0.434721	0.415181	0.166007	0.30718	0.0438656	0.177885	0.250421	2.73373	8.33303	11.7758	0.087077	0.203078	0.0494275	0.149284	0.163016
	D_0__Bacteria, D_1__Firmicutes, D_2__Erysipelotrichia, D_3__Erysipelotrichales, D_4__Erysipelotrichaceae	Erysipelotrichaceae	1.10102	0.117466	1.3826	0.524766	2.25739	0.171297	0.19504	0.576646	14.8568	0.725496	0.0653077	0.934158	0.453085	0.266248	0.190568
	D_0__Bacteria, D_1__Firmicutes, D_2__Clostridia, D_3__Clostridiales, D_4__Peptostreptococcaceae	Peptostreptococcaceae	1.5459	0.504294	0.168378	0.407441	3.63747	0.18667	0.907778	0.109456	0.661935	1.70718	0.560063	2.96945	0.613724	0.492482	2.56693
	D_0__Bacteria, D_1__Firmicutes, D_2__Clostridia, D_3__Clostridiales, D_4__Christensenellaceae	Christensenellaceae	3.04101	1.05719	0.969953	1.73642	1.07302	0.753267	0.520106	0.210903	0.720774	0.316463	0.564021	0.345232	1.17802	2.09151	0.307664
	D_0__Bacteria, D_1__Proteobacteria, D_2__Deltaproteobacteria, D_3__Desulfovibrionales, D_4__Desulfovibrionaceae	Desulfovibrionaceae	0.0975075	0.123542	1.45849	3.86962	0	0	1.87816	0.710129	0	0	0	6.08782	0	0	0
	D_0__Bacteria, D_1__Firmicutes, D_2__Clostridia, D_3__Clostridiales, D_4__Clostridiaceae 1	Clostridiaceae 1	0.0182826	0	0.294069	0.108793	2.48684	0.155924	2.00819	0.0453842	0.00735483	2.55969	0.12072	2.0195	0.416014	0.280099	3.46007
	D_0__Bacteria, D_1__Actinobacteria, D_2__Actinobacteria, D_3__Corynebacteriales, D_4__Corynebacteriaceae	Corynebacteriaceae	0.268146	0.022278	0.0806318	0.0447971	2.61844	0.019765	0.310619	0.70212	8.36612	0.376741	0.0356224	0.0180514	0.0123569	0.120042	0.061992
	D_0__Bacteria, D_1__Proteobacteria, D_2__Betaproteobacteria, D_3__Burkholderiales, D_4__Alcaligenaceae	Alcaligenaceae	0.855222	0.573153	1.30908	0.0426639	0.320556	0.0153728	3.72502	0.0587324	1.00026	0.114099	0.0217692	0.00676926	0.111212	0.101574	0.009184
	D_0__Bacteria, D_1__Firmicutes, D_2__Clostridia, D_3__Clostridiales, D_4__Peptococcaceae	Peptococcaceae	0.0365653	0.0830363	0.173121	0.343445	0.479147	0.164708	0.741633	0.523253	0.742838	0.572646	0.233525	0.449027	0.370706	0.183142	0.328328
	D_0__Bacteria, D_1__Firmicutes, D_2__Bacilli, D_3__Lactobacillales, D_4__Aerococcaceae	Aerococcaceae	0.302679	0.0202528	0.0592881	0.0298648	0.833446	0.0263534	0.252829	0.23226	4.07826	0.163613	0.0356224	0.0383591	0.148282	0.101574	0.0574
	D_0__Bacteria, D_1__Actinobacteria, D_2__Actinobacteria, D_3__Micrococcales, D_4__Micrococcaceae	Micrococcaceae	0.0426595	0.0263286	0.00948609	0.0234652	0.14172	0.0131767	0.0144474	0.194885	6.26264	0.0602786	0.0197902	0.0180514	0.0370706	0.0323191	0.016072
	D_0__Bacteria, D_1__Proteobacteria, D_2__Gammaproteobacteria, D_3__Pseudomonadales, D_4__Moraxellaceae	Moraxellaceae	0.0243769	0.0182275	0	0.00426639	0.691726	0.0263534	0.202263	0.245608	0.456	0.0925707	0.00197902	0	0.00411896	0.660234	1.01483
	D_0__Bacteria, D_1__Firmicutes, D_2__Bacilli, D_3__Lactobacillales, D_4__Streptococcaceae	Streptococcaceae	0.325025	0.285564	0.0877463	0.10666	0.354299	0.0988251	0.0433422	0.0587324	0.110323	0.193753	0.102909	0.225642	0.247137	0.215461	0.094136
	D_0__Bacteria, D_1__Bacteroidetes, D_2__Bacteroidia, D_3__Bacteroidales, D_4__Porphyromonadaceae	Porphyromonadaceae	0.0690678	0.0243033	0.265611	0.00639959	0.074234	0.00878445	0.125211	0.549949	0.21329	0.206669	0.0692658	0.169231	0.185353	0.204688	0.004592
	D_0__Bacteria, D_1__Bacteroidetes, D_2__Bacteroidia, D_3__Bacteroidales, D_4__Rikenellaceae	Rikenellaceae	0.400187	0.109365	0.0853748	0.0490635	0.074234	0.076864	0.093908	0.440493	0.0147097	0.146391	0.00989511	0.0451284	0.0988549	0.126199	0.032144
	D_0__Bacteria, D_1__Tenericutes, D_2__Mollicutes, D_3__Anaeroplasmatales, D_4__Anaeroplasmataceae	Anaeroplasmataceae	0	0.127592	0	0.403174	0	0.0549028	0.00963159	0.3871	0.0147097	0.256184	0.0118741	0.0451284	0.0453085	0	0.087248
	D_0__Bacteria, D_1__Tenericutes, D_2__Mollicutes, D_3__Mollicutes RF9, Ambiguous_taxa	Ambiguous_taxa	0.341276	0.265311	0	0.138658	0.0202456	0.199846	0	0.00266966	0	0.101182	0.0178112	0.00451284	0.0329516	0.0554042	0.121688
	D_0__Bacteria, D_1__Firmicutes, D_2__Bacilli, D_3__Bacillales, D_4__Staphylococcaceae	Staphylococcaceae	0.0385967	0.00405055	0.0332013	0.031998	0.850317	0.0109806	0.0337106	0.0667414	0.375097	0.0796538	0.0118741	0.0451284	0.0288327	0.0954184	0.020664
	D_0__Bacteria, D_1__Tenericutes, D_2__Mollicutes, D_3__Mollicutes RF9, D_4__uncultured bacterium	uncultured bacterium-2	0.10157	0.0162022	0	0.172789	0.0202456	0.0285495	0	0	0.0147097	0.0236809	0.00395804	0.0248206	0.107093	0.198532	0.110208
	D_0__Bacteria, D_1__Firmicutes, D_2__Clostridia, D_3__Clostridiales, D_4__Family XIII	Family XIII	0.0304711	0.0141769	0.0687742	0.0149324	0.101228	0.0175689	0.108355	0.0186876	0.139742	0.0818066	0.00395804	0.0541541	0.0370706	0.115425	0.082656
	D_0__Bacteria, D_1__Deferribacteres, D_2__Deferribacteres, D_3__Deferribacterales, D_4__Deferribacteraceae	Deferribacteraceae	0	0	0	0.0170656	0.00337427	0.00878445	0.00722369	0.0293662	0.0257419	0.0645842	0.0316644	0.0315899	0.0247137	0.258553	0.144648
	D_0__Bacteria, D_1__Bacteroidetes, D_2__Bacteroidia, D_3__Bacteroidales, D_4__Prevotellaceae	Prevotellaceae	0.117822	0.0627835	0.0426874	0.0149324	0	0	0	0.210903	0.0147097	0.0215281	0.00989511	0.00676926	0.0659033	0.00307801	0.061992
	D_0__Bacteria, D_1__Firmicutes, D_2__Bacilli, D_3__Lactobacillales, D_4__Enterococcaceae	Enterococcaceae	0.0182826	0.00607583	0.00237152	0	0.0877311	0.00219611	0.00963159	0.0106786	0.364064	0.187294	0.00989511	0.00902568	0.0164758	0.00769503	0.009184
	D_0__Bacteria, D_1__Firmicutes, D_2__Clostridia, D_3__Clostridiales, D_4__Clostridiales vadinBB60 group	Clostridiales vadinBB60 group	0	0.00405055	0	0.0255984	0.0168714	0.00878445	0	0.00533931	0.00735483	0.0409033	0	0.0203078	0.0329516	0.0384752	0.084952
	D_0__Bacteria, D_1__Firmicutes, D_2__Clostridia, D_3__Clostridiales, D_4__Defluviitaleaceae	Defluviitaleaceae	0.0142198	0.00405055	0.0166007	0.0149324	0.0472398	0.00658834	0.0024079	0.00266966	0.0110323	0.0150696	0.0277063	0.0203078	0.00823791	0.0138511	0.002296
	D_0__Bacteria, D_1__Bacteroidetes, D_2__Sphingobacteriia, D_3__Sphingobacteriales, D_4__Sphingobacteriaceae	Sphingobacteriaceae	0	0	0	0	0	0	0	0	0	0	0	0	0	0.00923404	0.16072
	D_0__Bacteria, D_1__Actinobacteria, D_2__Coriobacteriia, D_3__Coriobacteriales, D_4__Coriobacteriaceae	Coriobacteriaceae	0.00406281	0.00202528	0.00237152	0	0.0134971	0	0.0216711	0.00800897	0.132387	0.00645842	0.00197902	0.00902568	0.0205948	0.00153901	0.002296
	D_0__Bacteria, D_1__Cyanobacteria, D_2__Melainabacteria, D_3__Gastranaerophilales, D_4__uncultured bacterium	uncultured bacterium-1	0.00203141	0.00202528	0	0	0	0	0	0.128144	0	0.00861122	0.00395804	0.00451284	0	0.00153901	0.009184
	D_0__Bacteria, D_1__Proteobacteria, D_2__Alphaproteobacteria, D_3__Rhodospirillales, D_4__Rhodospirillaceae	Rhodospirillaceae	0	0	0.0450589	0	0	0	0.00722369	0.0533931	0	0.0172224	0	0.00225642	0.0123569	0.00153901	0
	D_0__Bacteria, D_1__Elusimicrobia, D_2__Elusimicrobia, D_3__Elusimicrobiales, D_4__Elusimicrobiaceae	Elusimicrobiaceae	0.0487537	0.0162022	0.00948609	0	0	0	0.0313027	0	0	0	0	0	0	0	0
	D_0__Bacteria, D_1__Bacteroidetes, D_2__Flavobacteriia, D_3__Flavobacteriales, D_4__Flavobacteriaceae	Flavobacteriaceae	0	0	0	0	0	0	0	0	0	0	0	0	0	0.00153901	0.107912
	D_0__Bacteria, D_1__Firmicutes, D_2__Bacilli, D_3__Bacillales, D_4__Planococcaceae	Planococcaceae	0	0	0	0	0.0269942	0.00219611	0.0048158	0.00800897	0.0294193	0.00430561	0	0	0	0.0153901	0.002296
	D_0__Bacteria, D_1__Firmicutes, D_2__Bacilli, D_3__Lactobacillales, D_4__Carnobacteriaceae	Carnobacteriaceae	0	0	0	0	0	0	0	0	0.0919354	0	0	0	0	0.00769503	0
	D_0__Bacteria, D_1__Tenericutes, D_2__Mollicutes, D_3__Mollicutes RF9, D_4__uncultured rumen bacterium	uncultured rumen bacterium	0.00406281	0.00405055	0	0.0021332	0	0	0.0048158	0.00266966	0	0.0193753	0	0	0.00411896	0.00769503	0.016072
	D_0__Bacteria, D_1__Proteobacteria, D_2__Gammaproteobacteria, D_3__Pasteurellales, D_4__Pasteurellaceae	Pasteurellaceae	0	0.00202528	0.00711457	0.0021332	0	0.00219611	0.00722369	0.00266966	0.00367742	0.00430561	0.00197902	0.00451284	0	0.00461702	0
	N/A	N/A	0	0.00405055	0	0	0.00674855	0	0.0048158	0.0106786	0	0	0	0.00902568	0.0164758	0	0
	D_0__Bacteria, D_1__Actinobacteria, D_2__Actinobacteria, D_3__Bifidobacteriales, D_4__Bifidobacteriaceae	Bifidobacteriaceae	0	0	0	0	0.0134971	0	0.024079	0	0	0	0	0	0	0	0
	D_0__Bacteria, D_1__Actinobacteria, D_2__Actinobacteria, D_3__Micrococcales, D_4__Dermabacteraceae	Dermabacteraceae	0	0	0	0	0	0	0	0	0.0257419	0	0	0	0	0.00153901	0
	D_0__Bacteria, D_1__Firmicutes, D_2__Clostridia, D_3__Clostridiales,	{Unknown Family} Clostridiales	0	0	0	0.00426639	0	0	0	0	0	0.00645842	0	0	0.00823791	0	0.002296
	D_0__Bacteria, D_1__Actinobacteria, D_2__Actinobacteria, D_3__Micrococcales, D_4__Dermatophilaceae	Dermatophilaceae	0	0	0	0	0	0	0	0	0.0147097	0	0	0	0	0	0
	D_0__Bacteria, D_1__Firmicutes, , ,	{Unknown Class} Firmicutes	0	0	0	0	0	0	0	0	0.0147097	0	0	0	0	0	0
	D_0__Bacteria, D_1__Saccharibacteria, D_2__Unknown Class, D_3__Unknown Order, D_4__Unknown Family	Unknown Family	0	0	0	0	0	0	0	0	0	0	0	0	0	0	0.009184
	D_0__Bacteria, , , ,	{Unknown Phylum} Bacteria	0	0	0.00474305	0	0	0	0	0	0	0	0	0	0	0	0
	D_0__Bacteria, D_1__Actinobacteria, D_2__Actinobacteria, D_3__Micrococcales, D_4__Brevibacteriaceae	Brevibacteriaceae	0	0	0	0	0	0	0	0	0.00735483	0	0	0	0	0	0
	D_0__Bacteria, D_1__Actinobacteria, D_2__Actinobacteria, D_3__Micrococcales, D_4__Microbacteriaceae	Microbacteriaceae	0	0	0	0	0	0	0	0	0	0	0	0	0	0	0.004592
	D_0__Bacteria, D_1__Cyanobacteria, D_2__Chloroplast, D_3__Camellia sinensis var. sinensis, D_4__Camellia sinensis var. sinensis	Camellia sinensis var. sinensis	0	0	0	0	0	0	0.0048158	0	0	0	0	0	0	0	0
	D_0__Bacteria, D_1__Firmicutes, D_2__Bacilli, D_3__Bacillales, D_4__Bacillaceae	Bacillaceae	0	0	0	0	0.00674855	0	0	0	0	0	0	0	0	0	0
	D_0__Bacteria, D_1__Firmicutes, D_2__Bacilli, D_3__Bacillales, D_4__Paenibacillaceae	Paenibacillaceae	0	0	0	0	0	0	0	0	0	0	0	0	0	0	0.004592
	D_0__Bacteria, D_1__Firmicutes, D_2__Clostridia, D_3__Clostridiales, D_4__Caldicoprobacteraceae	Caldicoprobacteraceae	0	0	0	0	0	0	0	0	0	0.00430561	0	0	0	0	0
	D_0__Bacteria, D_1__Firmicutes, D_2__Negativicutes, D_3__Selenomonadales, D_4__Veillonellaceae	Veillonellaceae	0	0	0	0	0	0	0	0	0.00735483	0	0	0	0	0	0
	D_0__Bacteria, D_1__Proteobacteria, D_2__Alphaproteobacteria, D_3__Caulobacterales, D_4__Caulobacteraceae	Caulobacteraceae	0	0	0	0	0	0	0	0	0	0	0	0	0	0	0.004592
	D_0__Bacteria, D_1__Proteobacteria, D_2__Gammaproteobacteria, D_3__Xanthomonadales, D_4__Xanthomonadaceae	Xanthomonadaceae	0	0	0	0	0	0	0	0	0	0	0	0	0	0.00307801	0
	D_0__Bacteria, D_1__Tenericutes, D_2__Mollicutes, D_3__Mollicutes RF9,	{Unknown Family} Mollicutes RF9	0	0	0	0	0	0	0	0	0	0	0	0	0	0.00307801	0
Average	Taxonomy	Family	NC	HC	PC	K2	K6
	D_0__Bacteria, D_1__Firmicutes, D_2__Clostridia, D_3__Clostridiales, D_4__Ruminococcaceae	Ruminococcaceae	39.0508	41.6093	32.3917	25.4767	36.8481
	D_0__Bacteria, D_1__Firmicutes, D_2__Clostridia, D_3__Clostridiales, D_4__Lachnospiraceae	Lachnospiraceae	21.9044	35.2975	18.3919	37.358	24.8854
	D_0__Bacteria, D_1__Bacteroidetes, D_2__Bacteroidia, D_3__Bacteroidales, D_4__Bacteroidaceae	Bacteroidaceae	17.3813	2.60632	10.1906	8.78222	8.59501
	D_0__Bacteria, D_1__Firmicutes, D_2__Bacilli, D_3__Lactobacillales, D_4__Lactobacillaceae	Lactobacillaceae	2.37567	7.87046	4.15018	9.15519	7.49807
	D_0__Bacteria, D_1__Bacteroidetes, D_2__Bacteroidia, D_3__Bacteroidales, D_4__Bacteroidales S24-7 group	Bacteroidales S24-7 group	8.11035	2.92932	6.76946	3.45865	7.52835
	D_0__Bacteria, D_1__Verrucomicrobia, D_2__Verrucomicrobiae, D_3__Verrucomicrobiales, D_4__Verrucomicrobiaceae	Verrucomicrobiaceae	4.53062	0.691633	5.76977	3.82289	8.10749
	D_0__Bacteria, D_1__Proteobacteria, D_2__Gammaproteobacteria, D_3__Enterobacteriales, D_4__Enterobacteriaceae	Enterobacteriaceae	0.338636	0.17631	3.77239	4.022	0.120576
	D_0__Bacteria, D_1__Firmicutes, D_2__Erysipelotrichia, D_3__Erysipelotrichales, D_4__Erysipelotrichaceae	Erysipelotrichaceae	0.867029	0.984484	5.20948	0.574987	0.3033
	D_0__Bacteria, D_1__Firmicutes, D_2__Clostridia, D_3__Clostridiales, D_4__Peptostreptococcaceae	Peptostreptococcaceae	0.739524	1.41053	0.559723	1.74556	1.22438
	D_0__Bacteria, D_1__Firmicutes, D_2__Clostridia, D_3__Clostridiales, D_4__Christensenellaceae	Christensenellaceae	1.68939	1.18757	0.483928	0.408572	1.1924
	D_0__Bacteria, D_1__Proteobacteria, D_2__Deltaproteobacteria, D_3__Desulfovibrionales, D_4__Desulfovibrionaceae	Desulfovibrionaceae	0.559845	1.28987	0.862763	2.02927	0
	D_0__Bacteria, D_1__Firmicutes, D_2__Clostridia, D_3__Clostridiales, D_4__Clostridiaceae 1	Clostridiaceae 1	0.104117	0.917186	0.686975	1.56663	1.3854
	D_0__Bacteria, D_1__Actinobacteria, D_2__Actinobacteria, D_3__Corynebacteriales, D_4__Corynebacteriaceae	Corynebacteriaceae	0.123685	0.894333	3.12629	0.143472	0.0647971
	D_0__Bacteria, D_1__Proteobacteria, D_2__Betaproteobacteria, D_3__Burkholderiales, D_4__Alcaligenaceae	Alcaligenaceae	0.912485	0.126198	1.59467	0.0475457	0.0739901
	D_0__Bacteria, D_1__Firmicutes, D_2__Clostridia, D_3__Clostridiales, D_4__Peptococcaceae	Peptococcaceae	0.0975743	0.3291	0.669241	0.4184	0.294059
	D_0__Bacteria, D_1__Firmicutes, D_2__Bacilli, D_3__Lactobacillales, D_4__Aerococcaceae	Aerococcaceae	0.127407	0.296555	1.52111	0.0791983	0.102419
	D_0__Bacteria, D_1__Actinobacteria, D_2__Actinobacteria, D_3__Micrococcales, D_4__Micrococcaceae	Micrococcaceae	0.0261581	0.0594538	2.15732	0.0327067	0.0284872
	D_0__Bacteria, D_1__Proteobacteria, D_2__Gammaproteobacteria, D_3__Pseudomonadales, D_4__Moraxellaceae	Moraxellaceae	0.0142014	0.240782	0.301291	0.0315166	0.559728
	D_0__Bacteria, D_1__Firmicutes, D_2__Bacilli, D_3__Lactobacillales, D_4__Streptococcaceae	Streptococcaceae	0.232778	0.186595	0.070799	0.174101	0.185578
	D_0__Bacteria, D_1__Bacteroidetes, D_2__Bacteroidia, D_3__Bacteroidales, D_4__Porphyromonadaceae	Porphyromonadaceae	0.119661	0.029806	0.29615	0.148389	0.131544
	D_0__Bacteria, D_1__Bacteroidetes, D_2__Bacteroidia, D_3__Bacteroidales, D_4__Rikenellaceae	Rikenellaceae	0.198309	0.0667205	0.183037	0.0671381	0.0857325
	D_0__Bacteria, D_1__Tenericutes, D_2__Mollicutes, D_3__Anaeroplasmatales, D_4__Anaeroplasmataceae	Anaeroplasmataceae	0.0425308	0.152692	0.137147	0.104395	0.0441855
	D_0__Bacteria, D_1__Tenericutes, D_2__Mollicutes, D_3__Mollicutes RF9, Ambiguous_taxa	Ambiguous_taxa	0.202196	0.119583	0.000889886	0.0411686	0.0700146
	D_0__Bacteria, D_1__Firmicutes, D_2__Bacilli, D_3__Bacillales, D_4__Staphylococcaceae	Staphylococcaceae	0.0252829	0.297765	0.158516	0.0455521	0.048305
	D_0__Bacteria, D_1__Tenericutes, D_2__Mollicutes, D_3__Mollicutes RF9, D_4__uncultured bacterium	uncultured bacterium-2	0.0392575	0.0738614	0.00490322	0.0174865	0.138611
	D_0__Bacteria, D_1__Firmicutes, D_2__Clostridia, D_3__Clostridiales, D_4__Family XIII	Family XIII	0.0378074	0.0445765	0.0889283	0.0466396	0.078384
	D_0__Bacteria, D_1__Deferribacteres, D_2__Deferribacteres, D_3__Deferribacterales, D_4__Deferribacteraceae	Deferribacteraceae	0	0.00974143	0.0207773	0.0426128	0.142638
	D_0__Bacteria, D_1__Bacteroidetes, D_2__Bacteroidia, D_3__Bacteroidales, D_4__Prevotellaceae	Prevotellaceae	0.0744308	0.00497746	0.0752042	0.0127308	0.0436578
	D_0__Bacteria, D_1__Firmicutes, D_2__Bacilli, D_3__Lactobacillales, D_4__Enterococcaceae	Enterococcaceae	0.00891	0.0299758	0.128125	0.0687383	0.0111183
	D_0__Bacteria, D_1__Firmicutes, D_2__Clostridia, D_3__Clostridiales, D_4__Clostridiales vadinBB60 group	Clostridiales vadinBB60 group	0.00135018	0.0170847	0.00423138	0.0204037	0.0521263
	D_0__Bacteria, D_1__Firmicutes, D_2__Clostridia, D_3__Clostridiales, D_4__Defluviitaleaceae	Defluviitaleaceae	0.0116237	0.0229202	0.00536994	0.0210279	0.00812832
	D_0__Bacteria, D_1__Bacteroidetes, D_2__Sphingobacteriia, D_3__Sphingobacteriales, D_4__Sphingobacteriaceae	Sphingobacteriaceae	0	0	0	0	0.0566514
	D_0__Bacteria, D_1__Actinobacteria, D_2__Coriobacteriia, D_3__Coriobacteriales, D_4__Coriobacteriaceae	Coriobacteriaceae	0.00281987	0.00449903	0.0540224	0.00582104	0.00814326
	D_0__Bacteria, D_1__Cyanobacteria, D_2__Melainabacteria, D_3__Gastranaerophilales, D_4__uncultured bacterium	uncultured bacterium-1	0.00135223	0	0.0427145	0.00569404	0.00357434
	D_0__Bacteria, D_1__Proteobacteria, D_2__Alphaproteobacteria, D_3__Rhodospirillales, D_4__Rhodospirillaceae	Rhodospirillaceae	0.0150196	0	0.0202056	0.00649296	0.00463196
	D_0__Bacteria, D_1__Elusimicrobia, D_2__Elusimicrobia, D_3__Elusimicrobiales, D_4__Elusimicrobiaceae	Elusimicrobiaceae	0.024814	0	0.0104342	0	0
	D_0__Bacteria, D_1__Bacteroidetes, D_2__Flavobacteriia, D_3__Flavobacteriales, D_4__Flavobacteriaceae	Flavobacteriaceae	0	0	0	0	0.0364837
	D_0__Bacteria, D_1__Firmicutes, D_2__Bacilli, D_3__Bacillales, D_4__Planococcaceae	Planococcaceae	0	0.0097301	0.0140814	0.0014352	0.00589535
	D_0__Bacteria, D_1__Firmicutes, D_2__Bacilli, D_3__Lactobacillales, D_4__Carnobacteriaceae	Carnobacteriaceae	0	0	0.0306451	0	0.00256501
	D_0__Bacteria, D_1__Tenericutes, D_2__Mollicutes, D_3__Mollicutes RF9, D_4__uncultured rumen bacterium	uncultured rumen bacterium	0.00270445	0.000711066	0.00249515	0.00645842	0.00929533
	D_0__Bacteria, D_1__Proteobacteria, D_2__Gammaproteobacteria, D_3__Pasteurellales, D_4__Pasteurellaceae	Pasteurellaceae	0.00304661	0.0014431	0.00452359	0.00359916	0.00153901
	N/A	N/A	0.00135018	0.00224952	0.00516481	0.00300856	0.00549194
	D_0__Bacteria, D_1__Actinobacteria, D_2__Actinobacteria, D_3__Bifidobacteriales, D_4__Bifidobacteriaceae	Bifidobacteriaceae	0	0.00449903	0.00802633	0	0
	D_0__Bacteria, D_1__Actinobacteria, D_2__Actinobacteria, D_3__Micrococcales, D_4__Dermabacteraceae	Dermabacteraceae	0	0	0.00858064	0	0.000513002
	D_0__Bacteria, D_1__Firmicutes, D_2__Clostridia, D_3__Clostridiales,	{Unknown Family} Clostridiales	0	0.00142213	0	0.00215281	0.0035113
	D_0__Bacteria, D_1__Actinobacteria, D_2__Actinobacteria, D_3__Micrococcales, D_4__Dermatophilaceae	Dermatophilaceae	0	0	0.00490322	0	0
	D_0__Bacteria, D_1__Firmicutes, , ,	{Unknown Class} Firmicutes	0	0	0.00490322	0	0
	D_0__Bacteria, D_1__Saccharibacteria, D_2__Unknown Class, D_3__Unknown Order, D_4__Unknown Family	Unknown Family	0	0	0	0	0.00306133
	D_0__Bacteria, , , ,	{Unknown Phylum} Bacteria	0.00158102	0	0	0	0
	D_0__Bacteria, D_1__Actinobacteria, D_2__Actinobacteria, D_3__Micrococcales, D_4__Brevibacteriaceae	Brevibacteriaceae	0	0	0.00245161	0	0
	D_0__Bacteria, D_1__Actinobacteria, D_2__Actinobacteria, D_3__Micrococcales, D_4__Microbacteriaceae	Microbacteriaceae	0	0	0	0	0.00153067
	D_0__Bacteria, D_1__Cyanobacteria, D_2__Chloroplast, D_3__Camellia sinensis var. sinensis, D_4__Camellia sinensis var. sinensis	Camellia sinensis var. sinensis	0	0	0.00160527	0	0
	D_0__Bacteria, D_1__Firmicutes, D_2__Bacilli, D_3__Bacillales, D_4__Bacillaceae	Bacillaceae	0	0.00224952	0	0	0
	D_0__Bacteria, D_1__Firmicutes, D_2__Bacilli, D_3__Bacillales, D_4__Paenibacillaceae	Paenibacillaceae	0	0	0	0	0.00153067
	D_0__Bacteria, D_1__Firmicutes, D_2__Clostridia, D_3__Clostridiales, D_4__Caldicoprobacteraceae	Caldicoprobacteraceae	0	0	0	0.0014352	0
	D_0__Bacteria, D_1__Firmicutes, D_2__Negativicutes, D_3__Selenomonadales, D_4__Veillonellaceae	Veillonellaceae	0	0	0.00245161	0	0
	D_0__Bacteria, D_1__Proteobacteria, D_2__Alphaproteobacteria, D_3__Caulobacterales, D_4__Caulobacteraceae	Caulobacteraceae	0	0	0	0	0.00153067
	D_0__Bacteria, D_1__Proteobacteria, D_2__Gammaproteobacteria, D_3__Xanthomonadales, D_4__Xanthomonadaceae	Xanthomonadaceae	0	0	0	0	0.001026
	D_0__Bacteria, D_1__Tenericutes, D_2__Mollicutes, D_3__Mollicutes RF9,	{Unknown Family} Mollicutes RF9	0	0	0	0	0.001026

## Sheet: Table S4SILVA-Weighted PCoA 1,2
Sample	PCo 1	PCo 2	PCo 3	PCo 4	PCo 5	PCo 6	PCo 7	PCo 8	PCo 9	PCo 10	PCo 11	PCo 12	PCo 13	PCo 14	PCo 15
NC1	-0.14	0.1	-0.05	0.08	0.05	0.01	0.05	-0.02	0.00699	0.02	-0.03	-0.03	-0.01	-0.00639	-1e-09
NC2	-0.1	-0.03	-0.04	-0.06	-0.02	0.02	0.02	0.04	-0.04	0.02	0.01	0.01	-0.03	0.00485	-1e-09
NC3	-0.2	0.04	0.00185	0.04	0.02	-0.00797	-0.03	0.03	-0.02	0.02	-0.02	-0.02	0.02	0.00982	-1e-09
HF1	-0.06	-0.17	0.04	0.06	0.04	-0.02	-0.00822	-0.04	0.06	0.0081	-0.01	0.02	-0.01	0.00488	-1e-09
HF2	0.22	0.05	0.05	0.12	-0.03	-0.05	0.00591	-0.01	-0.03	0.05	0.01	0.02	0.00485	-0.0021	-1e-09
HF3	-0.05	-0.2	0.01	0.01	0.09	-0.02	0.03	-0.02	-0.05	-0.04	0.02	-0.00887	0.0097	-0.00203	-1e-09
S1	-0.11	0.06	0.01	-0.01	0.02	0.08	0.00801	-0.00158	-0.00818	-0.02	-0.02	0.04	0.01	-0.00356	-1e-09
S2	-0.14	0.02	0.02	-0.00973	0.03	-0.04	-0.08	0.04	0.01	-0.00125	0.02	0.000942	-0.00468	-0.00838	-1e-09
S3	0.09	0.11	0.18	-0.14	0.03	-0.05	0.03	0.00706	0.00807	-0.01	-0.01	-0.00522	-0.00198	0.00105	-1e-09
K2-1	0.14	0.11	-0.17	-0.11	0.07	-0.02	-0.03	-0.05	0.00284	0.00549	0.00816	0.00241	0.00295	0.00226	-1e-09
K2-2	0.02	-0.18	-0.06	-0.11	-0.12	-0.02	0.00469	-0.000719	0.00204	0.03	-0.03	-0.00647	0.01	-0.00443	-1e-09
K2-3	0.09	-0.00642	0.09	0.02	-0.05	0.08	-0.06	-0.04	-0.02	-0.02	-0.00379	-0.02	-0.00971	0.000786	-1e-09
K6-1	-0.03	0.1	-0.07	0.08	-0.11	-0.06	0.01	-0.00152	0.00528	-0.07	-0.000201	0.00423	-0.00218	0.00207	-1e-09
K6-2	-0.08	0.04	0.02	-0.02	-0.05	0.05	0.04	-0.0045	0.05	0.02	0.05	-0.00954	0.0095	0.000425	-1e-09
K6-3	0.34	-0.05	-0.05	0.05	0.04	0.05	0.00751	0.07	0.02	-0.02	-0.00653	-0.00694	0.000929	0.000744	-1e-09
